# Supplementary material
Source: Springer Nature journal article supplement (https://www.springermedizin.de/resource/supplementary/13006_2009_94_MOESM5_ESM.pdf/9628000)

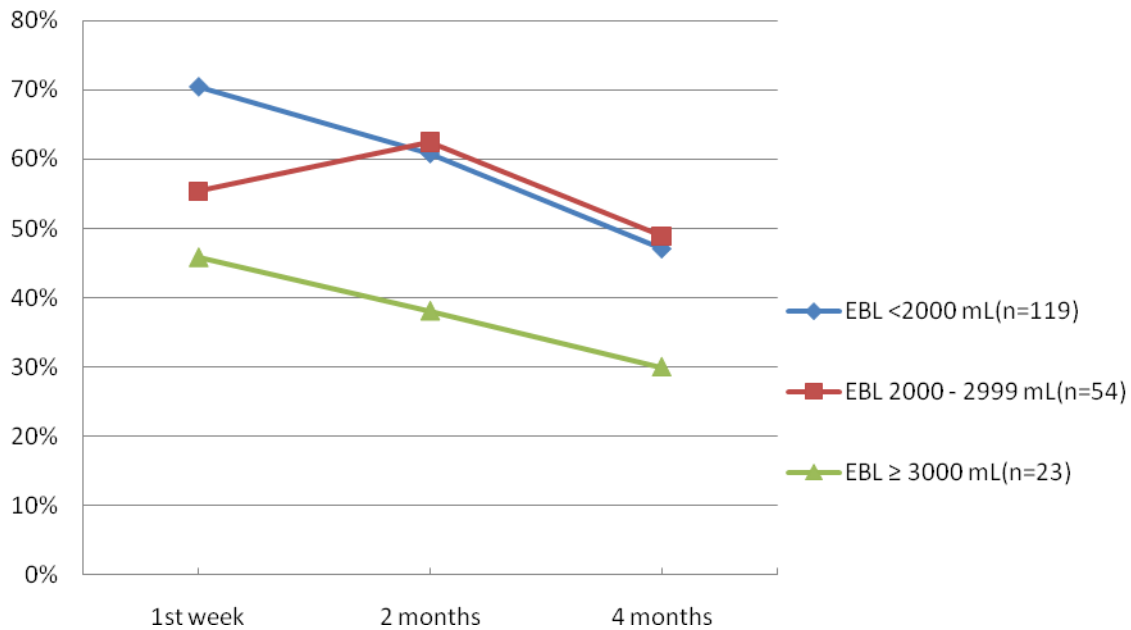

Supplement: MOESM5 [file 9628000]
